# Supplementary material
Source: Springer Nature journal article supplement (https://www.springermedizin.de/resource/supplementary/12877_2009_188_MOESM4_ESM.pdf/9441358)
Supplement: MOESM4 [file 9441358]

**Table 4. Multivariate adjusted ORs and 95% CI for care needs levels deteriorating**

| <i>Lower care needs level group</i>                                               |             |            |
|-----------------------------------------------------------------------------------|-------------|------------|
| Variable                                                                          | Adjusted OR | 95% CI     |
| Gender                                                                            |             |            |
| Female                                                                            | 1.09        | 0.63-1.91  |
| Age                                                                               | 1.04*       | 1.01-1.08  |
| Baseline care needs level                                                         | 0.89        | 0.60-1.31  |
| Respite stay in a nursing home                                                    | 2.55*       | 1.43-4.56  |
| Number of kinds of care services used                                             | 1.33*       | 1.02-1.74  |
| Goodness-of-fit statistics: $\chi^2=11.15$ ; $p=0.23^\dagger$ , c-statistic=0.69  |             |            |
| <i>Higher care needs level group</i>                                              |             |            |
| Variable                                                                          | Adjusted OR | 95%CI      |
| Gender                                                                            |             |            |
| Female                                                                            | 1.76        | 0.48-7.47  |
| Age                                                                               | 0.99        | 0.94-1.06  |
| Baseline care needs level                                                         | 0.16*       | 0.03-0.53  |
| Visiting nurse                                                                    | 4.65        | 0.99-19.98 |
| Health daycare                                                                    | 3.01        | 0.63-13.53 |
| Medical management by a physician                                                 | 6.99*       | 1.42-41.25 |
| Goodness -of- fit statistics: $\chi^2=1.43$ ; $p=0.99^\dagger$ , c-statistic=0.83 |             |            |
| * $p<0.05$                                                                        |             |            |
| † Hosmer-Lemeshow test                                                            |             |            |
